# Supplementary material
Source: PubMed Central journal article supplement (PMC2730113)
Supplement: NIHMS94258-supplement-01.pdf [file NIHMS94258-supplement-01.pdf]

**Axon initial segment  $\text{Ca}^{2+}$  channels influence action potential generation and timing**  
Kevin J. Bender and Laurence O. Trussell

Supplemental Figure 1.

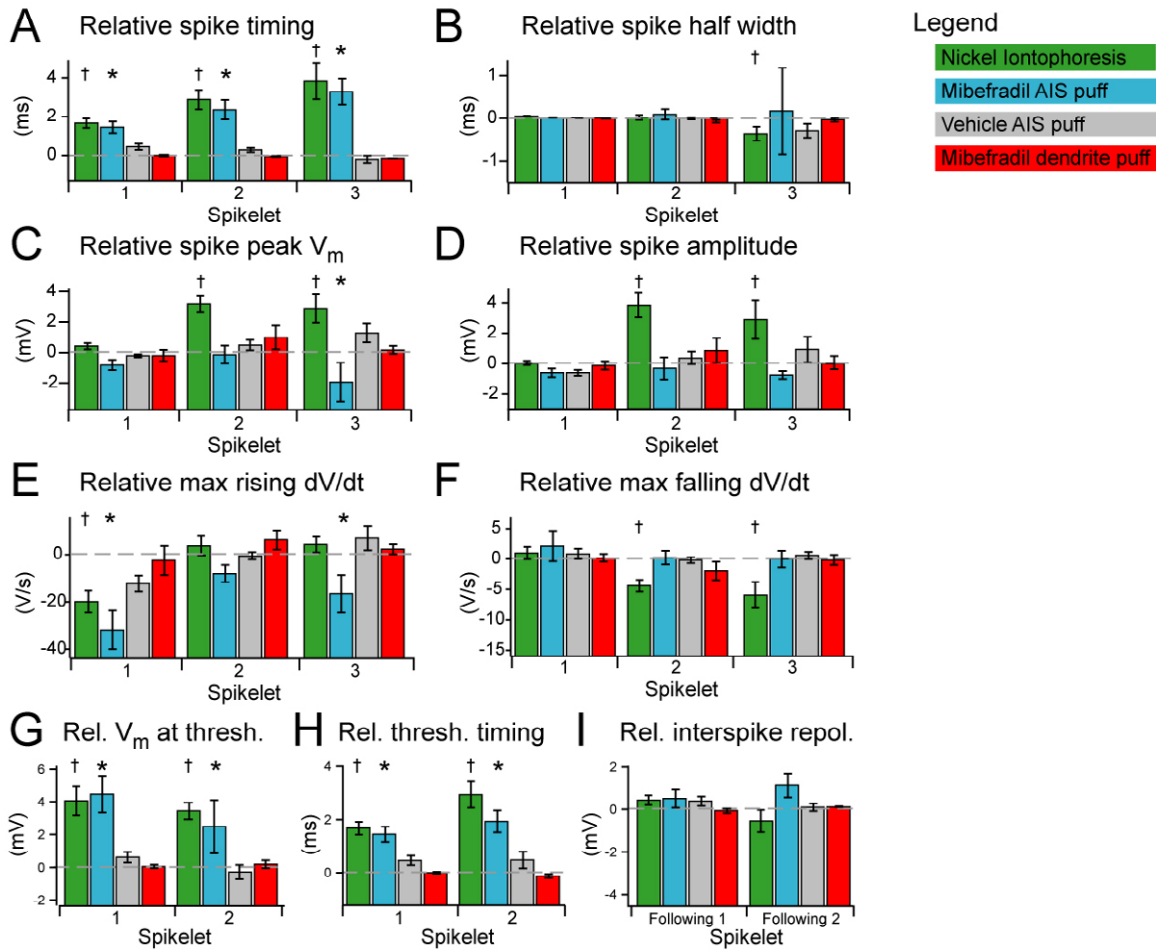

**Complex spike parameters across mibefradil puff and  $\text{Ni}^{2+}$  iontophoretic experiments.** All values are shown relative to control conditions. Green:  $\text{Ni}^{2+}$ ; cyan: AIS mibefradil; grey: AIS vehicle; red: dendrite mibefradil. †:  $p < 0.05$ ,  $\text{Ni}^{2+}$  vs. hypothetical mean, one sample t-test. \*:  $p < 0.05$ , AIS mibefradil vs. AIS vehicle, Fisher's PLSD. Bars are SEM.

- (A) Spike timing, measured at spike peak.
- (B) Spike half width, measured half way from threshold  $V_m$  to peak  $V_m$ .
- (C) Peak spike voltage.
- (D) Spike amplitude, measured from threshold  $V_m$  to peak  $V_m$ .
- (E) Maximum rising spikelet dV/dt.
- (F) Maximum falling spikelet dV/dt.
- (G)  $V_m$  at threshold.
- (H) Time of spike threshold.
- (I) Peak interspike repolarization potential.

Data in panels (A) and (G) are the same as in Figs. 6 and 7.

Supplemental Figure 2.

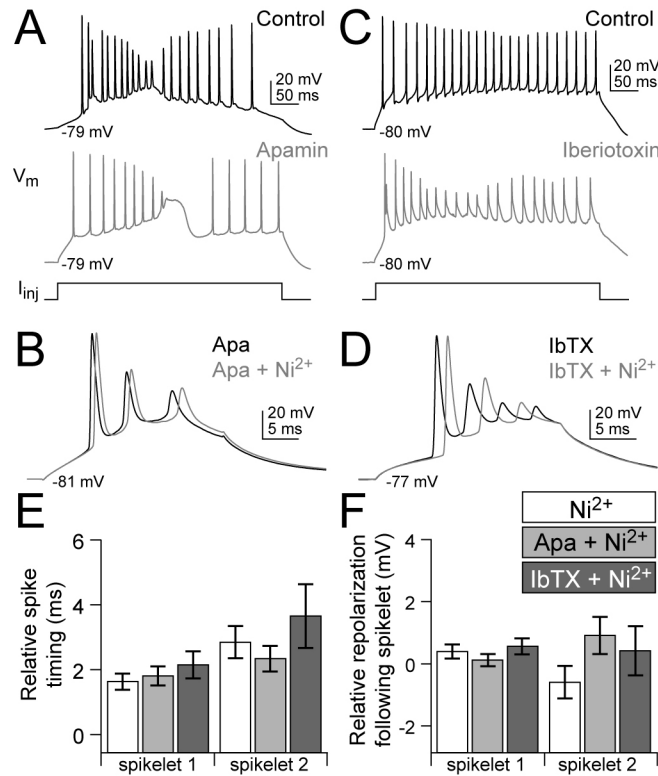

**$Ca^{2+}$ -activated  $K^+$  channels do not interact with AIS voltage-gated  $Ca^{2+}$  channels.**

- (A) Cartwheel cell spike response to somatic current injection in control conditions (top), and with bath application of apamin (bottom). Note broadening of underlying complex spike depolarization.
- (B) Complex spikes paired with local AIS  $Ni^{2+}$  iontophoresis, as in Fig. 7, but in the presence of bath applied apamin (Apa).
- (C) Same as (A), but for iberiotoxin (IbTX). Note increased simple spike width and reduction in afterhyperpolarization.
- (D) Same as (B), but for IbTX. Note decrease in inter-spike repolarization magnitude.
- (E) Relative timing of spike peak for control (white), apamin (light grey) and IbTX conditions (dark grey). BK/SK-block conditions were not statistically different than  $Ni^{2+}$  iontophoresis alone.
- (F) Relative peak interspike repolarization potential. Conditions were not statistically different. Bars are SEM.
